# Supplementary material for: A humidity-tolerant NO2 sensor based on Ag3PO4–SnSe2 heterostructures
Source: Royal Society of Chemistry journal article supplement (doi:10.1039/d2nj06076k), 2023-01-01
Supplement: d2nj06076k1.pdf [file d2nj06076k1.pdf]

## Supporting information

### Humidity-Tolerant NO<sub>2</sub> Sensor Based on Ag<sub>3</sub>PO<sub>4</sub>-SnSe<sub>2</sub>

#### Heterostructures

Juanyuan Hao<sup>a\*</sup>, Wen Lu<sup>a</sup>, Dongmin Yin<sup>a</sup>, Weixun Hao<sup>b</sup>, You Wang<sup>a\*</sup>

<sup>a</sup> *School of Materials Science and Engineering, Harbin Institute of Technology, Harbin 150001, P. R. China. E-mail: jyhao@hit.edu.cn and y-wang@hit.edu.cn.*

<sup>b</sup> *State Key Laboratory of Efficient and Clean Coal-fired Utility Boilers, Harbin Boiler Company Limited, Harbin 150046, P. R. China.*

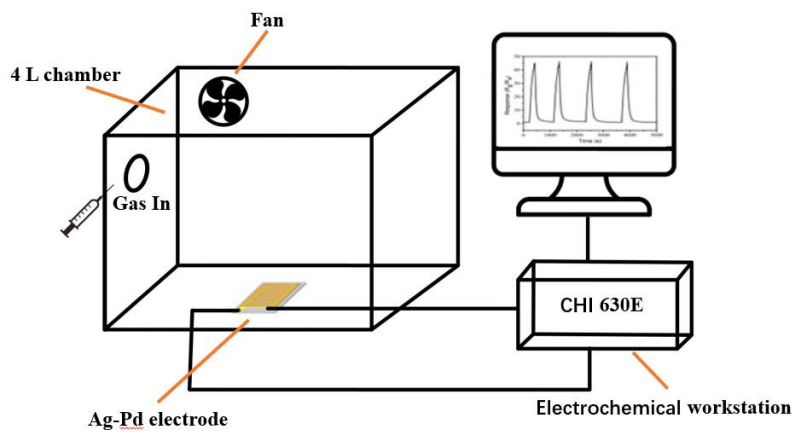

Fig. S1. Schematic diagram of the sensor measurement.

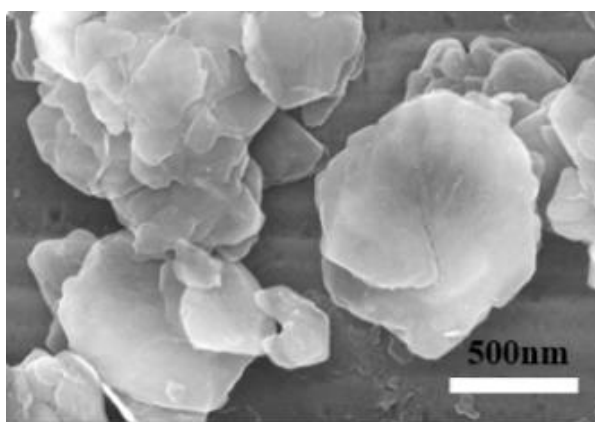

Fig. S2. SEM image of pristine SnSe<sub>2</sub> nanosheets.

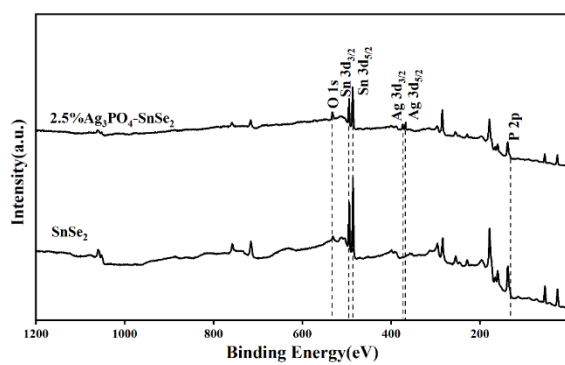

Fig. S3. The full XPS survey spectra of pure SnSe<sub>2</sub> and 2.5%Ag<sub>3</sub>PO<sub>4</sub>-SnSe<sub>2</sub>.

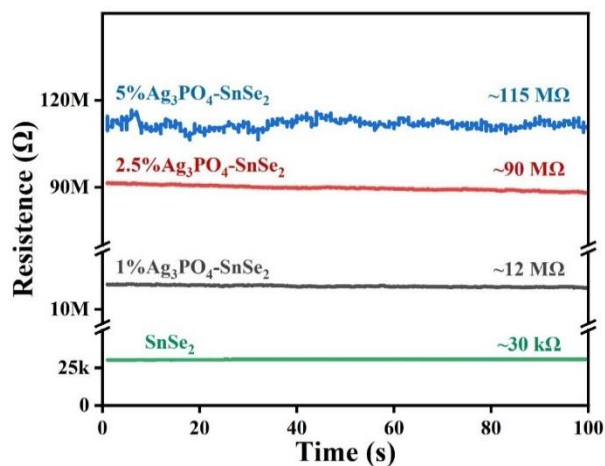

Fig. S4. Resistances of the films of pure SnSe<sub>2</sub> and Ag<sub>3</sub>PO<sub>4</sub>-SnSe<sub>2</sub> heterostructures.

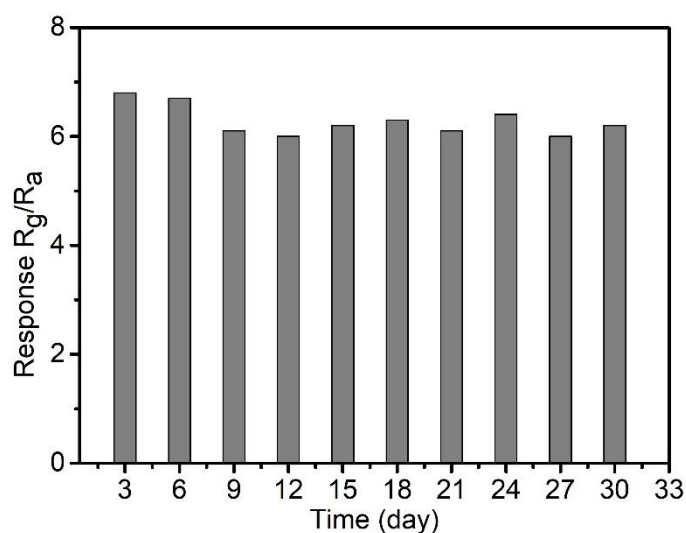

Fig. S5. Long-term stability test toward 5 ppm NO<sub>2</sub> for 1 month.

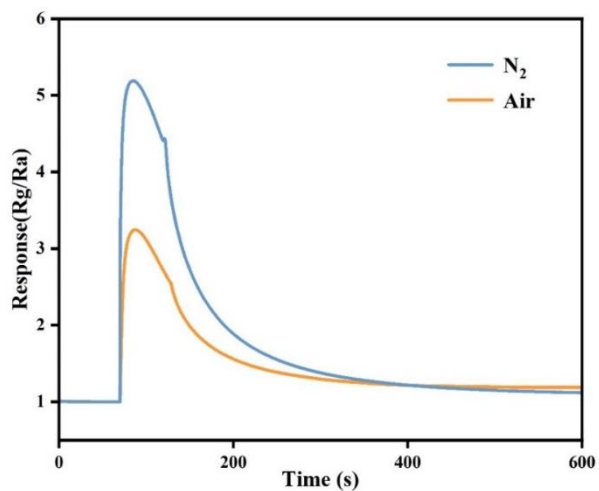

Fig. S6. The sensing response curve of the 2.5% Ag<sub>3</sub>PO<sub>4</sub>-SnSe<sub>2</sub> sensor towards 5 ppm NO<sub>2</sub> with air and N<sub>2</sub> as the background gases.
